# Supplementary material for: SERBP1 interacts with PARP1 and is present in PARylation-dependent protein complexes regulating splicing, cell division, and ribosome biogenesis
Source: eLife journal article supplement (doi:10.7554/elife.98152), 2024-07-02
Supplement: fig1-figsupp1-data1 [file elife-98152-fig1-figsupp1-data1-v1.pdf]

Figure 1–figure supplement 1 source data 1. PDF containing original protein gels for Figure 1–figure supplement 1.

**Sonication Extract (M2021-007)**

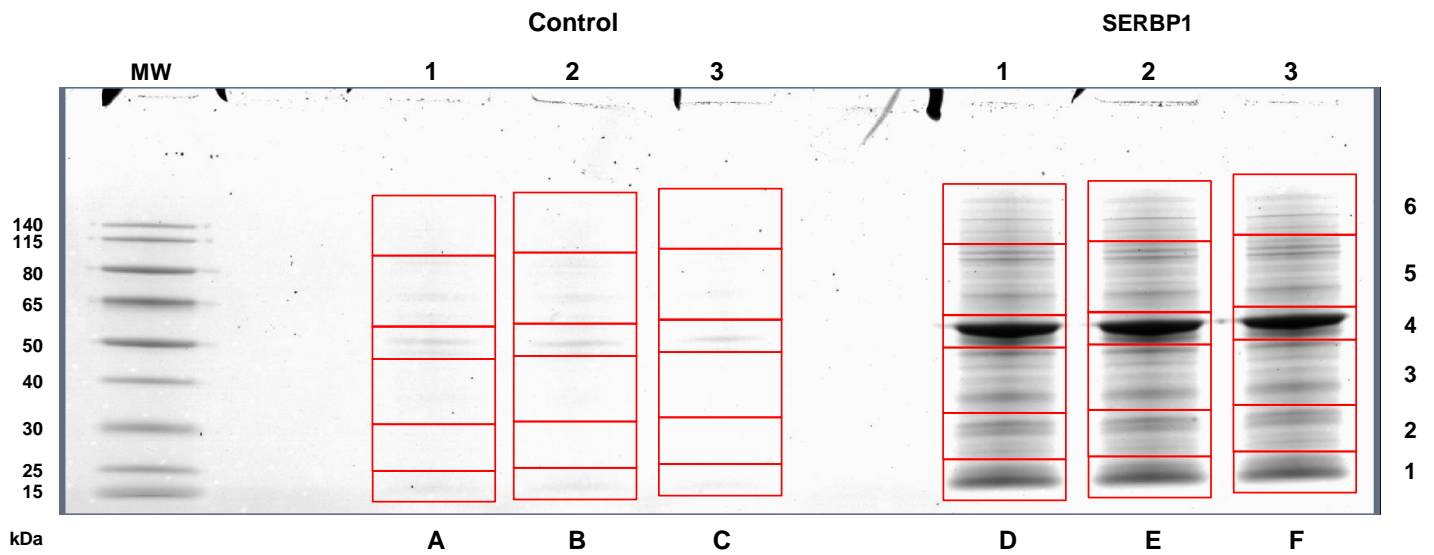

BioRad Criterion XT MOPS 12% SDS-PAGE reducing gel, colloidal Coomassie blue

**Polysomal Lysis Buffer (M2021-065)**

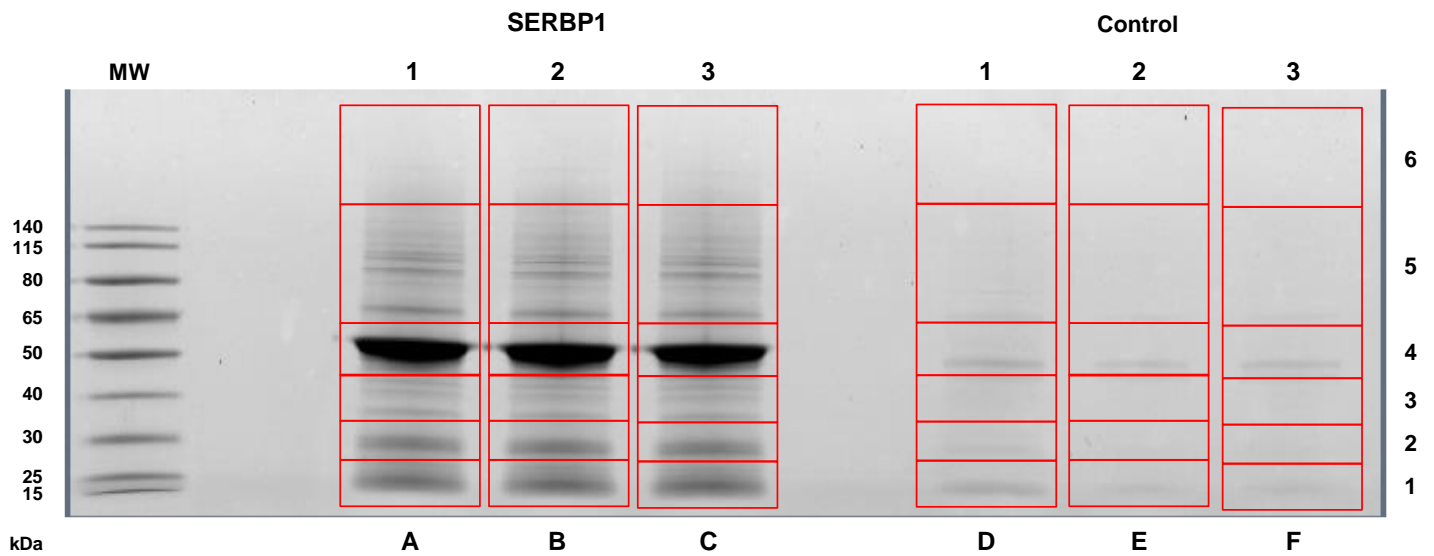

BioRad Criterion XT MOPS 12% SDS-PAGE reducing gel, colloidal Coomassie blue
