# Supplementary material for: SERBP1 interacts with PARP1 and is present in PARylation-dependent protein complexes regulating splicing, cell division, and ribosome biogenesis
Source: eLife journal article supplement (doi:10.7554/elife.98152), 2024-07-02
Supplement: fig1-figsupp2-data1 [file elife-98152-fig1-figsupp2-data1-v1.pdf]

Puromycin:

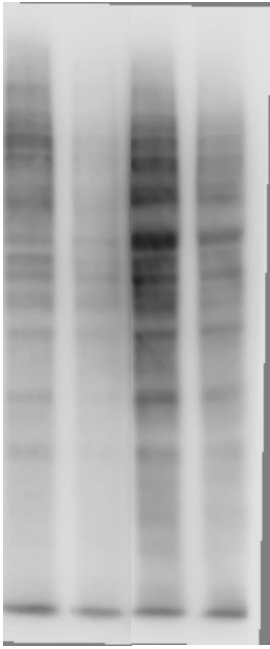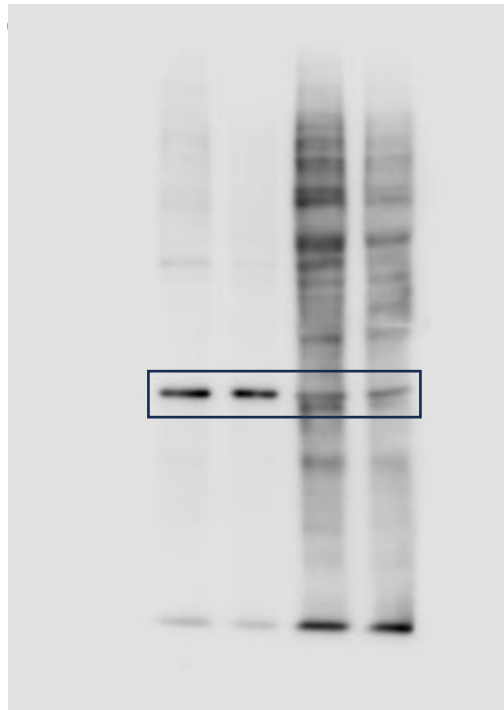

U251 SERBP1:

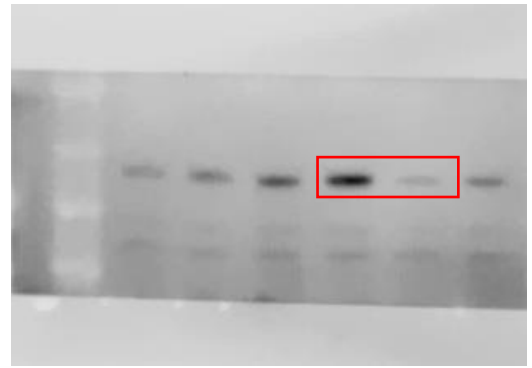

U251  $\beta$ -Actin

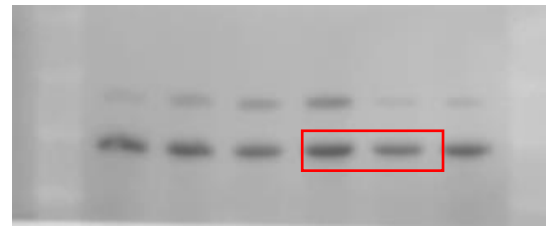

U343 SERBP1:

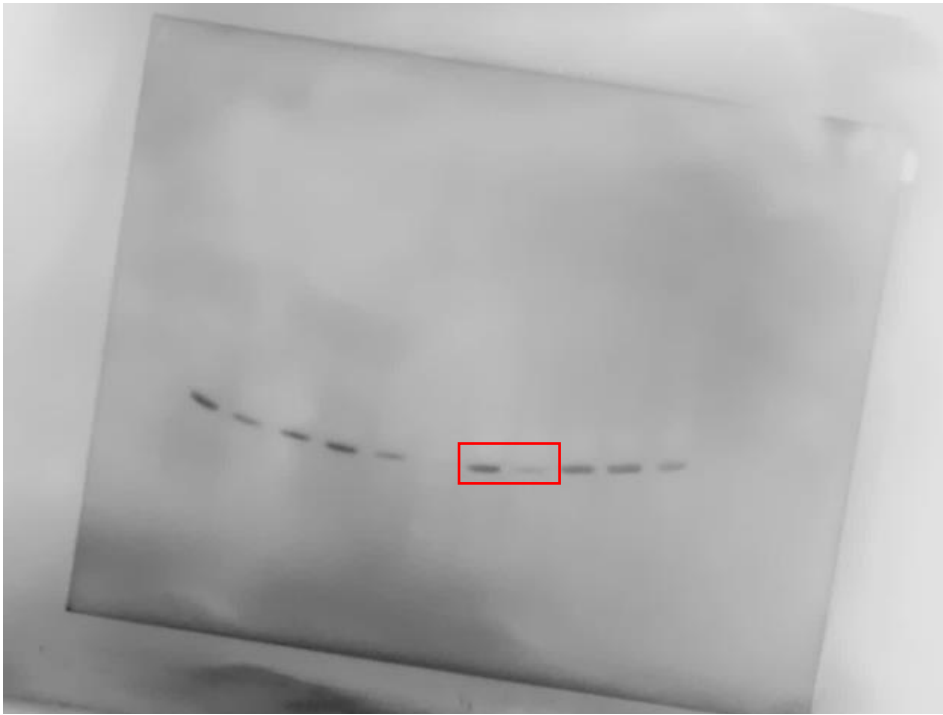

U343  $\beta$ -Actin

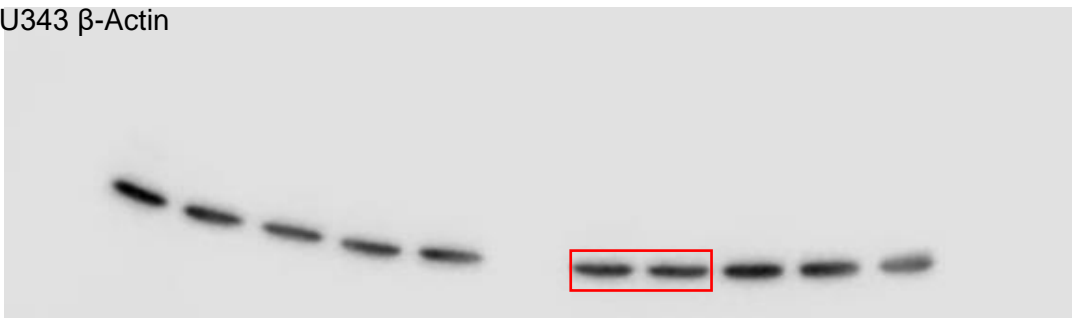

Supplementary Figure 2A: Translation level in U251 and U343 with or without SERBP1 knock down as determined by puromycin incorporation assay.
