# Supplementary material for: SERBP1 interacts with PARP1 and is present in PARylation-dependent protein complexes regulating splicing, cell division, and ribosome biogenesis
Source: eLife journal article supplement (doi:10.7554/elife.98152), 2024-07-02
Supplement: fig2-data1 [file elife-98152-fig2-data1-v1.pdf]

Figure 2-source data 1:PDF file containing original western blots for Figure 2B

U251 SERBP1:

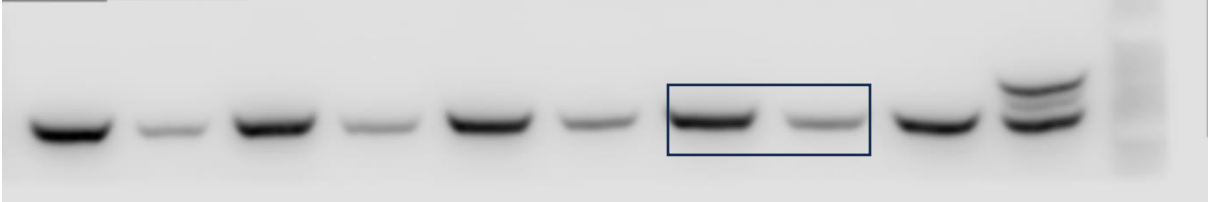

U251 b-Tubulin:

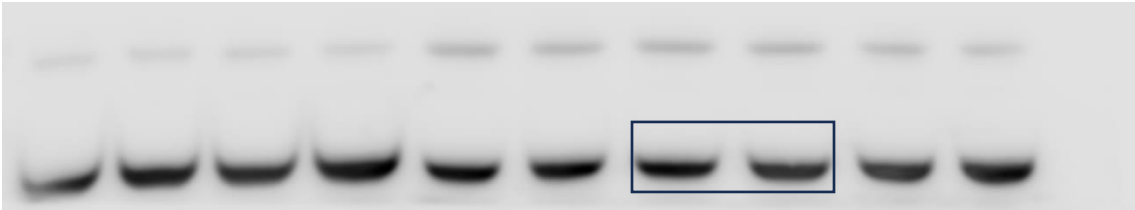

U343 SERBP1:

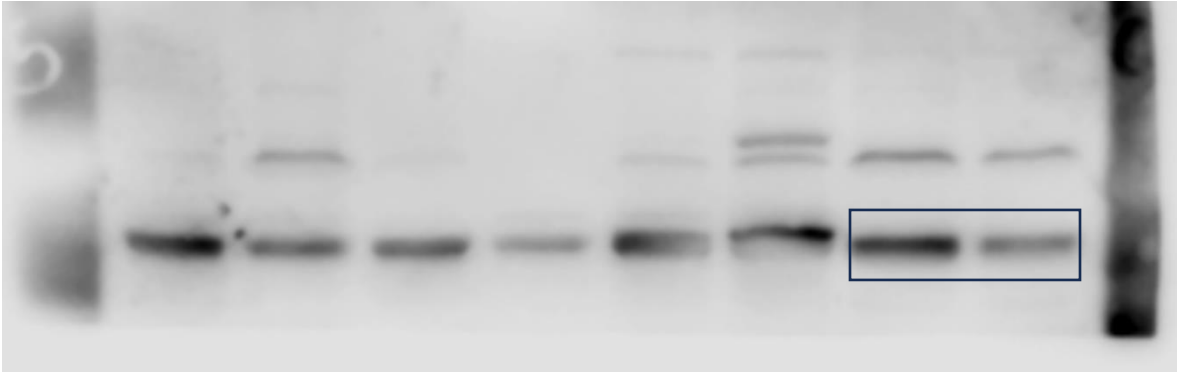

U343 b-Tubulin:

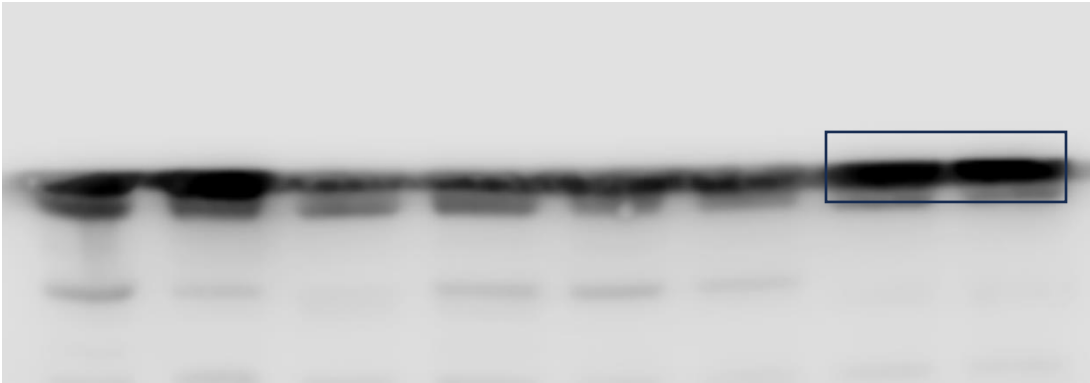

Figure 2B. Western blot showing SERBP1 knockdown in U251 and U343 cells.
