# Supplementary material for: SERBP1 interacts with PARP1 and is present in PARylation-dependent protein complexes regulating splicing, cell division, and ribosome biogenesis
Source: eLife journal article supplement (doi:10.7554/elife.98152), 2024-07-02
Supplement: fig4-data1 [file elife-98152-fig4-data1-v1.pdf]

Figure 4 - source data 1. PDF file containing original western blots for Figure 4A

PARP1:

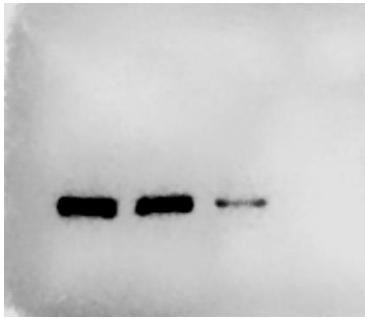

NCL:

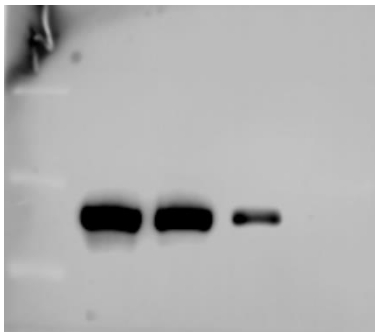

SYNCRIP:

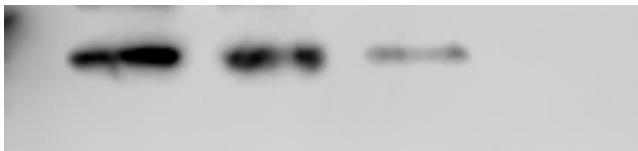

GAPDH:

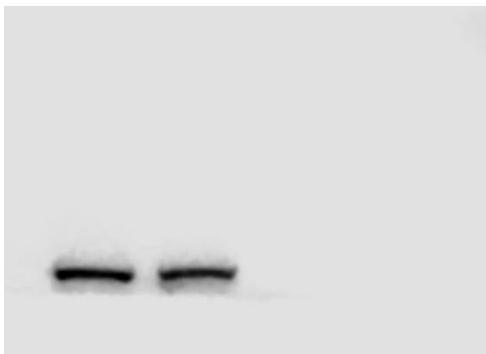

Figure 4A Results of IP-Western in U251 cells with control and anti-SERBP1 antibody confirm SERBP1 interaction with PARP1, NCL and SYNCRIP.
