# Supplementary material for: SERBP1 interacts with PARP1 and is present in PARylation-dependent protein complexes regulating splicing, cell division, and ribosome biogenesis
Source: eLife journal article supplement (doi:10.7554/elife.98152), 2024-07-02
Supplement: fig4-data2 [file elife-98152-fig4-data2-v1.pdf]

Figure 4-source data 2. PDF containing original silver staining gel and western blot for Figure 4E

Silver staining:

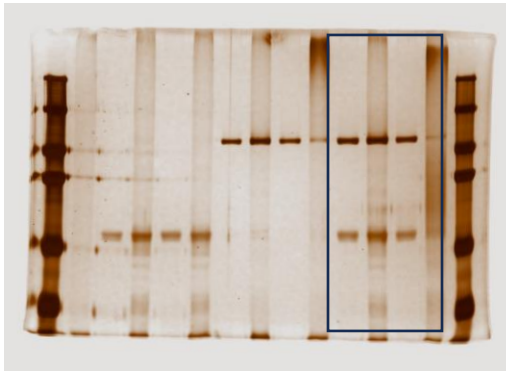

PAR:

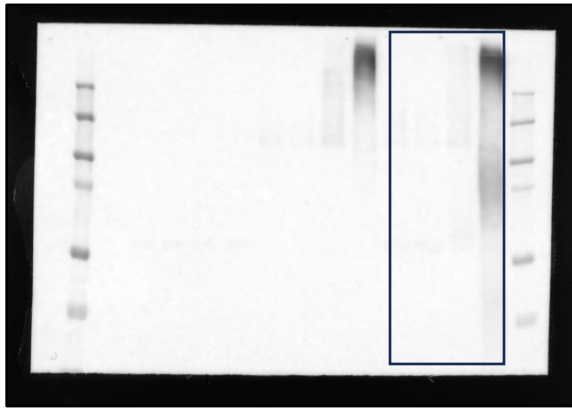

Figure 4E PARP1 ADP-ribosylates SERBP1 in vitro. Purified recombinant PARP1 and SERBP1 were combined in a reaction with or without sssDNA and NAD<sup>+</sup>. The reaction products were analyzed by SDS-PAGE with silver staining and Western blot for PAR.
