# Supplementary material for: SERBP1 interacts with PARP1 and is present in PARylation-dependent protein complexes regulating splicing, cell division, and ribosome biogenesis
Source: eLife journal article supplement (doi:10.7554/elife.98152), 2024-07-02
Supplement: fig4-data3 [file elife-98152-fig4-data3-v1.pdf]

Figure 4-source data 3. PDF file containing original westerns for Figure 4G

Poly-ADP-ribose:

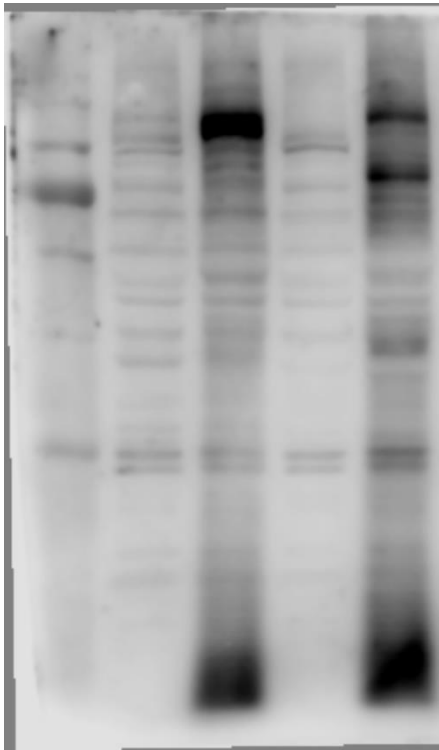

b-actin:

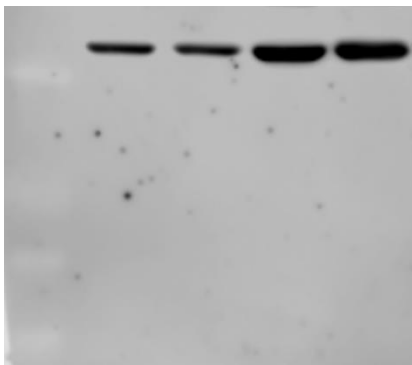

Figure 4G: Increase of PARylation levels in 293T and U251 GBM cells after H<sub>2</sub>O<sub>2</sub> treatment.
