# Supplementary material for: SERBP1 interacts with PARP1 and is present in PARylation-dependent protein complexes regulating splicing, cell division, and ribosome biogenesis
Source: eLife journal article supplement (doi:10.7554/elife.98152), 2024-07-02
Supplement: fig4-data4 [file elife-98152-fig4-data4-v1.pdf]

Figure 4-source data 4. PDF file containing original westerns for Figure 4H

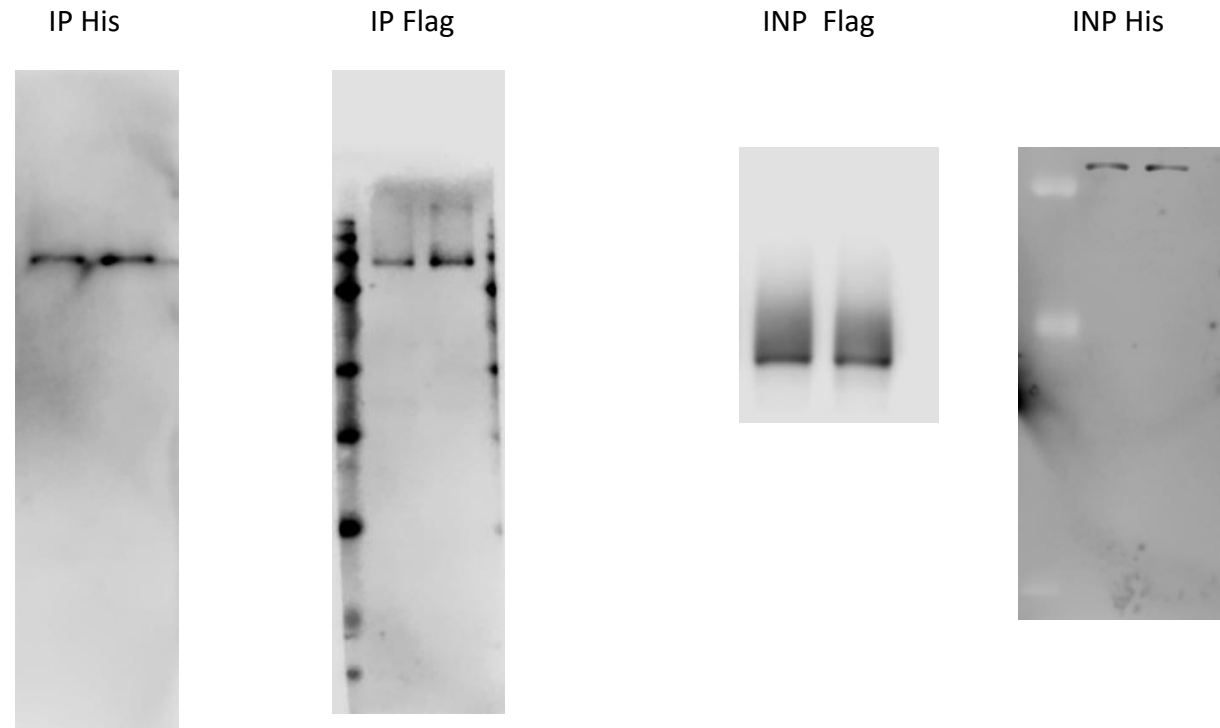

Figure 4H: SBP-SERBP1 pulldown in 293T cells shows increased SERBP1 association with PARP1 upon H<sub>2</sub>O<sub>2</sub> treatment. SBP-SERBP1-His detected by His antibody. Flag-PARP1 detected by Flag antibody.
