# Supplementary material for: SERBP1 interacts with PARP1 and is present in PARylation-dependent protein complexes regulating splicing, cell division, and ribosome biogenesis
Source: eLife journal article supplement (doi:10.7554/elife.98152), 2024-07-02
Supplement: fig4-data5 [file elife-98152-fig4-data5-v1.pdf]

Figure. 4I:

PARP1:

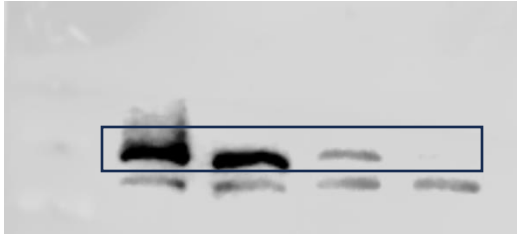

G3BP1:

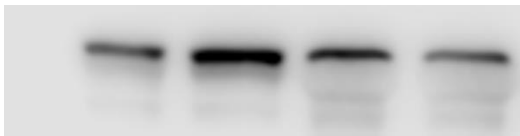

SERBP1:

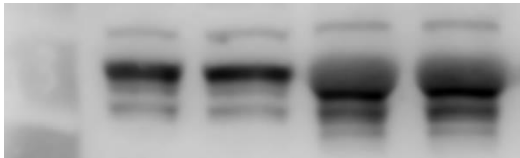

GAPDH:

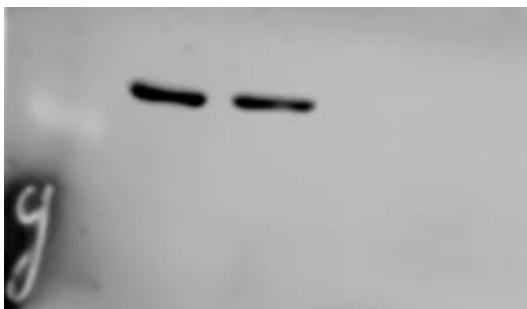

Figure 4I: PARP1 inhibitor PJ34 treatment repressed the interaction of SERBP1 with PARP1 and G3BP1.
