# Supplementary material for: SERBP1 interacts with PARP1 and is present in PARylation-dependent protein complexes regulating splicing, cell division, and ribosome biogenesis
Source: eLife journal article supplement (doi:10.7554/elife.98152), 2024-07-02
Supplement: fig4-data6 [file elife-98152-fig4-data6-v1.pdf]

Figure 4-source data 6. PDF file containing original westerns for Figure 4J

Poly-ADP-ribose:

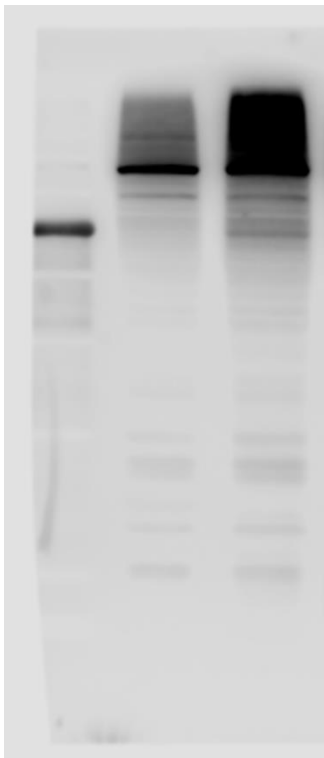

SERBP1:

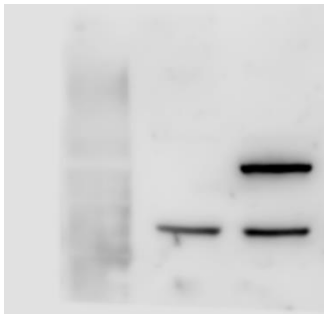

GAPDH:

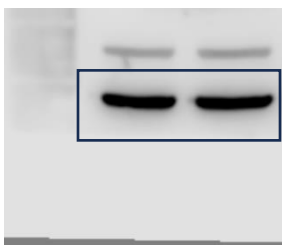

Figure 4J: SERBP1 transgenic expression (mGreen-SERBP1) in 293T cells increased the levels of PARylated proteins.
