# Supplementary material for: SERBP1 interacts with PARP1 and is present in PARylation-dependent protein complexes regulating splicing, cell division, and ribosome biogenesis
Source: eLife journal article supplement (doi:10.7554/elife.98152), 2024-07-02
Supplement: fig4-figsupp1-data1 [file elife-98152-fig4-figsupp1-data1-v1.pdf]

Figure 4- figure supplement 1- source data 1. PDF file containing western blots for Figure 4- figure supplement 1B.

Poly-ADP-ribose:

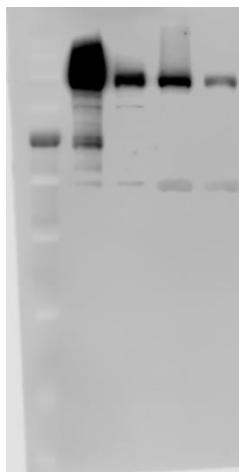

SERBP1:

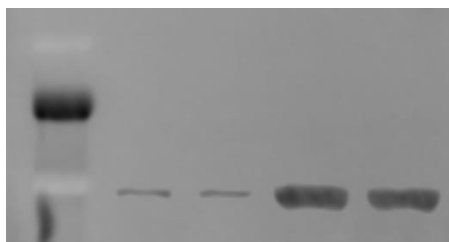

GAPDH:

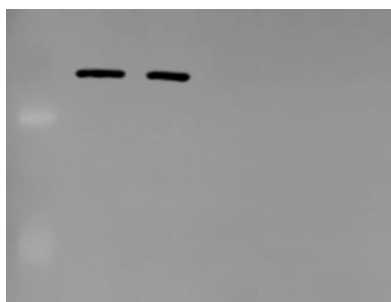

Figure 4- figure supplement 1B: Effect of PARylation/PAR binding on SERBP1 protein interactions. SERBP1 binding PAR proteins decreased upon PJ34 treatment.
