# Supplementary material for: SERBP1 interacts with PARP1 and is present in PARylation-dependent protein complexes regulating splicing, cell division, and ribosome biogenesis
Source: eLife journal article supplement (doi:10.7554/elife.98152), 2024-07-02

Operator Initials  
and date

LF  
3.24.22

Figure 7 - source data 1. PDF  
containing original westerns for  
Figure 7D, indicating bands and  
treatments.

### Figure 7D

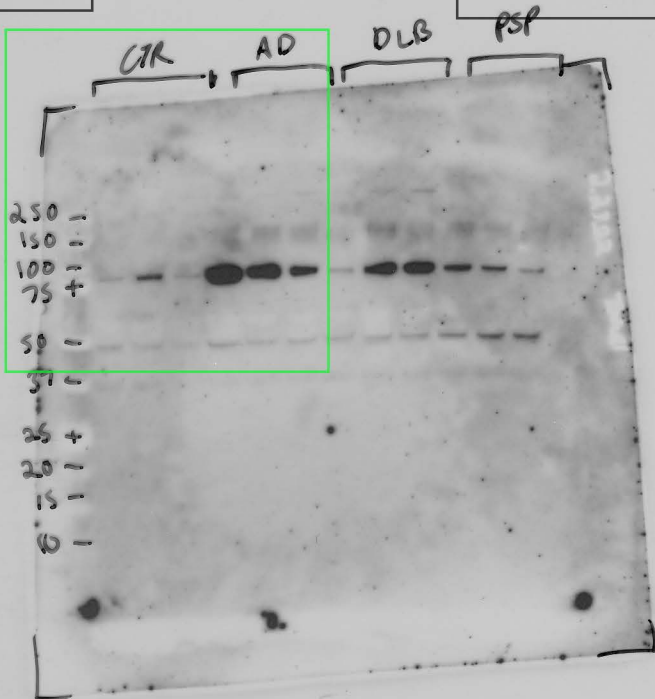

CTR - control  
 AD - ALZHEIMER'S disease  
 DLB - Dementia with Lewy Bodies  
 PSP - Progressive Supranuclear Palsy

Exposure Time  
 Antibody  
 Concentration  
 Secondary Ab

2 hours  
 PAIC (1:100) SC-10080  
 RBPI AM (1:5000)  
 2 hr

Operator Initials  
and date

LF  
3.21.22

### Figure 7D

Exposure Time  
Antibody  
Concentration

DM7A  
GAPDH  
(1:1000)  
ab 9485

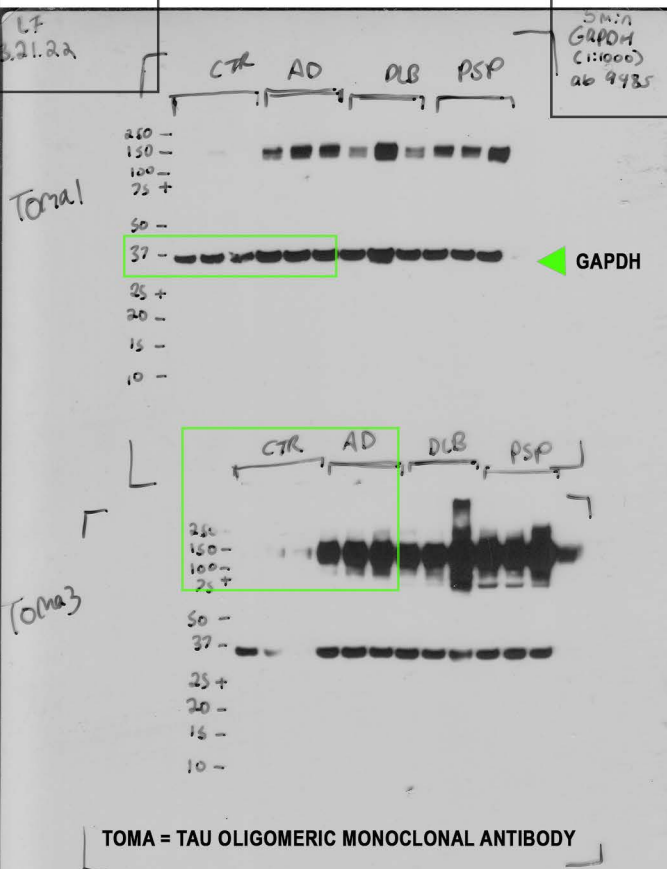

STRATAGENE

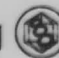

Supplement: fig7-data1 [file elife-98152-fig7-data1-v1.pdf]
